# Supplementary material for: Chimeric Antigen by the Fusion of SARS-CoV-2 Receptor Binding Domain with the Extracellular Domain of Human CD154: A Promising Improved Vaccine Candidate
Source: MDPI journal article supplement (doi:10.3390/vaccines10060897), 2022-06-03
Supplement: s1 [file s1]

**Supplementary Table S1.** List of primers

| Primer name     | Primer sequence                                 |
|-----------------|-------------------------------------------------|
| Oligo 1.1       | 5'-GGGCATCATCACCATCACCATTCTGAATTCTGGCGG-3'      |
| Oligo 1.2       | 5'-GCCGCCGCCAGAATTCGAATGGTGATGGTGATGATGCCC-3'   |
| Oligo 2.1       | 5'-CGGCTCCGGAGGGGGAGGGAGCGGCGGAGGGGGCTCCCCGC-3' |
| Oligo 2.2       | 5'-GGGGAGCCCCCTCCGCCGCTCCCTCCCCCTCCGGA-3'       |
| CD154-F         | 5'-ATATATCCGCGGAAGATAGAAGATGAAAGGAATC-3'        |
| CD154-R         | 5'-GTATATGTCGACCTAGAGCTTGAGTAAGCCAAAGG-3'       |
| RBD-F           | 5'-AGATCTGGAGAATCTATTGTTAG-3'                   |
| RBD-R           | 5'-CCCGGGCAAATTAGTAGAC-3'                       |
| pLWRBD-<br>CD-F | 5'-ATATATCTGCAGGCGCGCTTGACATTGATTATTG-3'        |
| pLWRBD-<br>CD-R | 5'-GTATATGTCGACCTAGAGCTTGAGTAAGCCAAAGG-3'       |

**Supplementary Table S2.** Sequence verification by ESI-MS analysis of the deglycosylated RBD-CD protein digested with trypsin by in-solution buffer free digestion method

| Protein                 | Residue <sup>a)</sup> | Z  | Theor m/z | Obs m/z | Sequence <sup>b)</sup>                                |
|-------------------------|-----------------------|----|-----------|---------|-------------------------------------------------------|
| Subcloning vector + RBD | 17-23                 | 1+ | 747.40    | 747.39  | SGESIVR                                               |
| RBD                     | (24-41)–(53-73)       | 3+ | 1452.35   | 1452.37 | FPDITNLCPFGEVFDATR<br>I                               |
|                         |                       | 4+ | 1089.51   | 1089.54 | ISNCVADYSVLYNSASFSTFK                                 |
| RBD                     | 42-50                 | 1+ | 1113.55   | 1113.53 | FASVYAWN R                                            |
|                         |                       | 2+ | 557.28    | 557.29  |                                                       |
| RBD                     | (74-81)–(120-139)     | 3+ | 1020.81   | 1020.82 | CYGVSP TK<br>I                                        |
|                         |                       | 4+ | 765.86    | 765.88  | LPDDFTGC V IAWNSNNLDSK                                |
| RBD                     | (82-98)–(205-223)     | 4+ | 992.52    | 992.53  | LNDLCFTNVYADSFVIR<br>I<br>VVVLSFELLHAPATVCGPK         |
| RBD                     | 99-103                | 1+ | 575.28    | 575.30  | GDEV R                                                |
| RBD                     | 104-112               | 2+ | 450.25    | 450.26  | QIAPGQTGK                                             |
| RBD                     | 113-119               | 1+ | 886.43    | 886.45  | IADYNYK                                               |
|                         |                       | 2+ | 443.72    | 443.73  |                                                       |
| RBD                     | 140-149               | 1+ | 1218.59   | 1218.57 | VGGNYNYLYR                                            |
|                         |                       | 2+ | 609.80    | 609.81  |                                                       |
| RBD                     | 150-152               | 1+ | 435.27    | 435.28  | LFR                                                   |
| RBD                     | 154-161               | 2+ | 495.77    | 495.78  | SNLKPFER                                              |
| RBD                     | 162-204               | 3+ | 1589.38   | 1589.40 | DISTEIYQAGSTPCNGVEGFNCYFPLQSYGFQPTN<br>I<br>GVGYQ PYR |
| 6xHis-spacer arm        | 225-255               | 3+ | 947.42    | 947.45  | STNLPGHHH HHSN GGGS GGGS GGGS R                       |
|                         |                       | 4+ | 710.82    | 710.83  |                                                       |
| sCD154                  | 257-261               | 1+ | 661.32    | 661.34  | IEDER                                                 |
| sCD154                  | 262-271               | 1+ | 1279.61   | 1279.61 | NLHEDFVFMK                                            |
|                         |                       | 2+ | 640.31    | 640.32  |                                                       |
|                         |                       | 3+ | 427.21    | 427.22  |                                                       |
| sCD154                  | 272-275               | 1+ | 517.31    | 517.32  | TIQR                                                  |
| sCD154                  | 282-292               | 2+ | 687.35    | 687.36  | SLSLLNCEEIK<br>I<br>nem                               |
|                         |                       | 2+ | 687.35    | 687.36  |                                                       |
| sCD154                  | 293-300               | 1+ | 941.47    | 941.47  | SQFEGFVK                                              |
|                         |                       | 2+ | 471.24    | 471.25  |                                                       |
| sCD154                  | 301-306               | 1+ | 733.39    | 733.39  | DIMLNK                                                |
| sCD154                  | 312-319               | 2+ | 506.72    | 506.74  | ENSFEMQK                                              |
| sCD154                  | 320-337               | 2+ | 926.46    | 926.47  | GDQNPQIAAHVISEASSK                                    |
|                         |                       | 3+ | 617.98    | 617.99  |                                                       |
| sCD154                  | 338-347               | 1+ | 1162.61   | 1162.63 | TTSVLQWAEK                                            |
|                         |                       | 2+ | 581.81    | 581.82  |                                                       |
| sCD154                  | 348-363               | 2+ | 902.43    | 902.44  | GYTMSNNLVTLENG K                                      |
| sCD154                  | 364-368               | 1+ | 588.37    | 588.35  | QLTVK                                                 |
| sCD154                  | 386-400               | 2+ | 845.43    | 845.45  | EASSQAPFIASLCLK                                       |

|                                                                          |         |    |        |        |                  |
|--------------------------------------------------------------------------|---------|----|--------|--------|------------------|
|                                                                          |         |    |        |        | <b>I<br/>nem</b> |
| sCD154                                                                   | 401-404 | 1+ | 416.23 | 416.25 | SPGR             |
| sCD154                                                                   | 405-407 | 1+ | 451.23 | 451.25 | FER              |
| Assignment of peptides containing one missed cleavage site of of trypsin |         |    |        |        |                  |
| sCD154                                                                   | 51-52   | 1+ | 303.21 | 303.21 | KR               |
| sCD154                                                                   | 256-261 | 1+ | 789.41 | 789.41 | KIEDER           |
|                                                                          |         | 2+ | 395.21 | 395.22 |                  |

a) The numbering of amino acids in this table corresponds to the position of the chimeric protein RBD-CD.

b) **D** means potential *N*-glycosylation sites that were transformed into Asp residues by PNGase F. **nem** corresponds to residues of free cysteine residues in the protein that were alkylated by *N*-ethylmaleimide in the processing of the sample before treatment with PNGase F. Lines connecting cysteine residues indicate disulfide bonds.

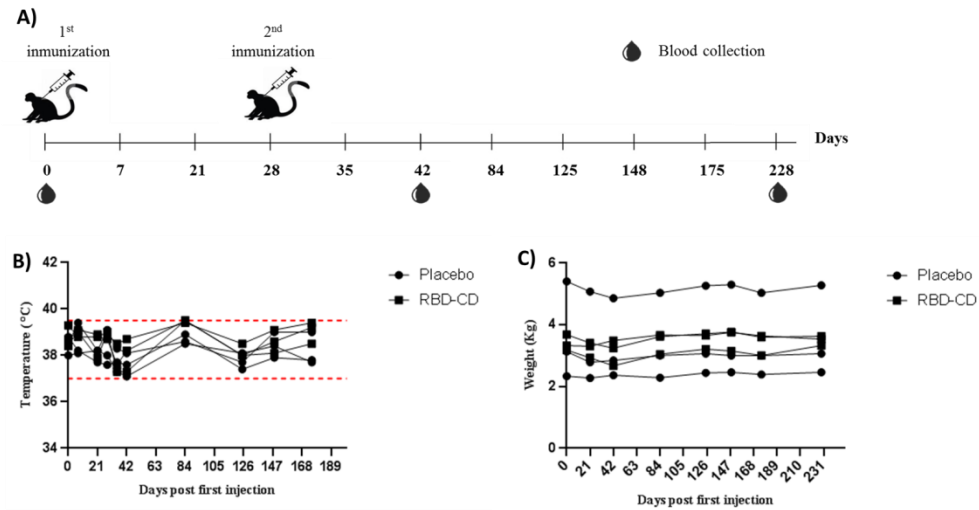

**Supplementary Figure S1.** Health monitoring in non-human primates. A) Schematic representation of overall study design. NHPs were intramuscularly immunized with 50  $\mu$ g of RBD-CD or PBS (Placebo) using alum as an adjuvant on 0 and 21 days. Blood collection were performed at times 0, 42 and 228 for hematological and biochemical tests. B) Body temperature, C) Weight measured at different days post first injection. The dashed lines mark the acceptable temperature range reported for cynomolgus macaques.

**Supplementary Table S3.** Hematological and biochemical parameter values of NHP before the first immunization.

| Parameters                                | Abbreviation | Unit                             | Placebo<br>1 | Placebo<br>2 | Placebo<br>3 | RBD-CD154<br>1 | RBD-CD154<br>2 | RBD-CD154<br>3 |
|-------------------------------------------|--------------|----------------------------------|--------------|--------------|--------------|----------------|----------------|----------------|
| Globulin index                            | A/G          |                                  | 1,5          | 1,7          | 1,3          | 1,6            | 2,2            | 1,7            |
| Alanine amino transferase                 | ALAT         | u/L                              | 13           | 15,7         | 12,4         | 17,2           | 26             | 16             |
| Aspartate amino transferase               | ASAT         | u/L                              | 37           | 58           | 53           | 40             | 43             | 50             |
| Alkaline phosphatase                      | ALP          | u/L                              | 305          | 540          | 351          | 305            | 394            | 337            |
| Creatinine                                | CREA         | μmol/L                           | 85           | 55           | 42           | 53             | 46             | 72             |
| Total proteins                            | TP           | g/L                              | 80           | 70,2         | 79,9         | 74,9           | 68,6           | 72,0           |
| Albumin                                   | ALB          | g/L                              | 51,2         | 43,4         | 45,8         | 49,4           | 47,4           | 45,0           |
| Glucose                                   | GLU          | mmol/L                           | 6,55         | 4,89         | 3,31         | 3,48           | 4,91           | 5,29           |
| Cholesterol                               | CHOL         | mmol/L                           | 4,41         | 3,54         | 3,88         | 3,49           | 2,51           | 3,90           |
| Total bilirubin                           | BIL-T        | μmol/L                           | 0            | 0,2          | 0            | 0              | 0              | 0,2            |
| Direct bilirubin                          | BIL-D2       | μmol/L                           | 0,7          | 0,9          | 0            | 0,8            | 0,3            | 0,2            |
| Triglycerides                             | TG           | mmol/L                           | 0,42         | 0,44         | 0,52         | 0,48           | 0,54           | 0,58           |
| Phosphorus                                | PHOS         | mmol/L                           | 1,9          | 1,67         | 2,02         | 1,10           | 1,16           | 2,00           |
| Urea                                      | UREA         | mmol/L                           | 10,74        | 11,06        | 10,69        | 10,43          | 10,18          | 7,51           |
| Calcium                                   | Ca           | mmol/L                           | 2,56         | 2,49         | 2,42         | 2,57           | 2,57           | 2,46           |
| Uric acid                                 | UA           | μmol/L                           | 0            | 2            | 5            | 8              | 4              | 0              |
| Gamma glutamyl transferase                | GGT          | u/L                              | 80           | 132          | 69           | 62             | 66             | 64             |
| Hemoglobin                                | HB           | g/dL                             | 14,6         | 13,5         | 11,8         | 13,9           | 12,7           | 14             |
| Hematocrit                                | HTC          | %                                | 48,3         | 46,1         | 39,4         | 45,9           | 42,4           | 46,5           |
| Erythrocyte                               | ETO          | 10 <sup>3</sup> /mm <sup>3</sup> | 1,91         | 7,06         | 6,6          | 7,63           | 6,96           | 7,58           |
| Platelet                                  | PLAT         | 10 <sup>3</sup> /mm <sup>3</sup> | 395          | 407          | 380          | 387            | 435            | 187            |
| Medium corpuscular volume                 | MCV          | fL                               | 61           | 65           | 60           | 60             | 61             | 61             |
| Mean corpuscular hemoglobin               | MCH          | pg                               | 18,5         | 19,2         | 17,8         | 18,2           | 18,7           | 18,4           |
| Mean corpuscular hemoglobin concentration | MCHC         | g/dL                             | 39,7         | 29,3         | 29,8         | 30,2           | 29,9           | 30,3           |

**Supplementary Table S4.** Hematological and biochemical parameter values of NHP 42 days before the first immunization

| Parameters                                | Abbreviation | Unit                             | Placebo<br>1 | Placebo<br>2 | Placebo<br>3 | RBD-CD154<br>1 | RBD-CD154<br>2 | RBD-CD154<br>3 |
|-------------------------------------------|--------------|----------------------------------|--------------|--------------|--------------|----------------|----------------|----------------|
| Globulin index                            | A/G          |                                  | 1,5          | 1,4          | 1,6          | 1,7            | 1,5            | 1,3            |
| Alanine amino transferase                 | ALAT         | u/L                              | 13           | nd           | 13           | 35             | 26             | 16             |
| Aspartate amino transferase               | ASAT         | u/L                              | 40           | 34           | 43           | 41             | 44             | 39             |
| Alkaline phosphatase                      | ALP          | u/L                              | 251          | 534          | 360          | 228            | 233            | 318            |
| Creatinine                                | CREA         | μmol/L                           | 89           | 65           | 44           | 63             | 55             | 44             |
| Total proteins                            | TP           | g/L                              | 82,9         | 70,9         | 76,7         | 82,8           | 86,1           | 71,9           |
| Albumin                                   | ALB          | g/L                              | 50,2         | 41,7         | 47,3         | 51,8           | 51,8           | 40,4           |
| Glucose                                   | GLU          | mmol/L                           | 6,21         | 4,34         | 3,84         | 5,17           | 5,31           | 5,26           |
| Cholesterol                               | CHOL         | mmol/L                           | 4,16         | 3,35         | 4,2          | 3,92           | 4,94           | 2,87           |
| Total bilirubin                           | BIL-T        | μmol/L                           | 2,4          | 2,5          | 1,6          | 5,3            | 2,3            | 1,4            |
| Direct bilirubin                          | BIL-D2       | μmol/L                           | 0,9          | 1,2          | 1            | 2,0            | 1,0            | 0,6            |
| Triglycerides                             | TG           | mmol/L                           | 0,26         | 0,83         | 0,66         | 0,44           | 0,63           | 0,54           |
| Phosphorus                                | PHOS         | mmol/L                           | 2            | 2,18         | 1,96         | 1,85           | 2,04           | 1,99           |
| Urea                                      | UREA         | mmol/L                           | 10,31        | 8,71         | 10,01        | 9,99           | 8,87           | 9,71           |
| Calcium                                   | Ca           | mmol/L                           | 2,6          | 2,32         | 2,43         | 3,10           | 2,53           | 2,57           |
| Uric acid                                 | UA           | μmol/L                           | 0            | 1            | 1            | 0              | 0              | 0              |
| Gamma glutamyl transferase                | GGT          | u/L                              | 90           | 111          | 68           | 69             | 52             | 70             |
| Hemoglobin                                | HB           | g/dL                             | 13           | 13,2         | 11,2         | 13,7           | 14,4           | 11,9           |
| Hematocrit                                | HTC          | %                                | 45,9         | 46,9         | 40,9         | 48,8           | 41,8           | 41,6           |
| Erythrocyte                               | ETO          | 10 <sup>3</sup> /mm <sup>3</sup> | 6,34         | 6,14         | 5,89         | 6,81           | 5,50           | 5,89           |
| Platelet                                  | PLAT         | 10 <sup>3</sup> /mm <sup>3</sup> | 665          | 378          | 403          | 408            | 514            | 405            |
| Medium corpuscular volume                 | MCV          | fL                               | 72           | 76           | 69           | 72             | 76             | 71             |
| Mean corpuscular hemoglobin               | MCH          | pg                               | 20,5         | 21,5         | 19,1         | 20,1           | 26,2           | 20,3           |
| Mean corpuscular hemoglobin concentration | MCHC         | g/dL                             | 28,3         | 28,1         | 27,5         | 28,1           | 34,4           | 28,6           |

**Supplementary Table S5.** Hematological and biochemical parameter values of NHP 228 days before the first immunization

| Parameters                                | Abbreviation | Unit                             | Placebo<br>1 | Placebo<br>2 | Placebo<br>3 | RBD-CD154<br>1 | RBD-CD154<br>2 | RBD-CD154<br>3 |
|-------------------------------------------|--------------|----------------------------------|--------------|--------------|--------------|----------------|----------------|----------------|
| Globulin index                            | A/G          |                                  | 2,2          | 1,8          | 2,3          | 1,8            | 2,2            | 1,8            |
| Alanine amino transferase                 | ALAT         | u/L                              | 17,4         | 13           | 10,1         | 11,8           | 13,7           | 11,2           |
| Aspartate amino transferase               | ASAT         | u/L                              | 24,4         | 36,9         | 33,8         | 68,2           | 27,0           | 35,9           |
| Alkaline phosphatase                      | ALP          | u/L                              | 144          | 385          | 294          | 223            | 282            | 334            |
| Creatinine                                | CREA         | μmol/L                           | 82           | 74           | 49           | 63             | 56             | 58             |
| Total proteins                            | TP           | g/L                              | 77           | 74           | 77           | 71             | 68             | 70             |
| Albumin                                   | ALB          | g/L                              | 53           | 48           | 54           | 46             | 47             | 45             |
| Glucose                                   | GLU          | mmol/L                           | 6,13         | 5,3          | 3,3          | 4,58           | 4,20           | 3,67           |
| Cholesterol                               | CHOL         | mmol/L                           | 2,89         | 3,23         | 4,22         | 2,89           | 3,63           | 3,29           |
| Total bilirubin                           | BIL-T        | μmol/L                           | 1,2          | 1,4          | 1,2          | 2,4            | 2,3            | 0,7            |
| Direct bilirubin                          | BIL-D2       | μmol/L                           | 0,7          | 0,6          | 0,6          | 0,8            | 0,8            | 0,5            |
| Triglycerides                             | TG           | mmol/L                           | 0,5          | 0,71         | 0,62         | 0,48           | 0,89           | 0,99           |
| Phosphorus                                | PHOS         | mmol/L                           | 1,71         | 1,71         | 2,02         | 1,92           | 1,62           | 1,26           |
| Urea                                      | UREA         | mmol/L                           | 13,5         | 11           | 14,3         | 8,7            | 8,9            | 10,9           |
| Calcium                                   | Ca           | mmol/L                           | 2,53         | 2,58         | 2,5          | 2,47           | 2,37           | 2,62           |
| Uric acid                                 | UA           | μmol/L                           | 1            | 1            | 1            | 4              | 1              | 0              |
| Gamma glutamyl transferase                | GGT          | u/L                              | 102          | 101          | 67           | 59             | 66             | 65             |
| Hemoglobin                                | HB           | g/dL                             | 11,8         | 12,1         | 11,6         | 12,6           | 12,5           | 10,8           |
| Hematocrit                                | HTC          | %                                | 41,2         | 43,3         | 40,8         | 44,8           | 43,0           | 39,0           |
| Erythrocyte                               | ETO          | 10 <sup>3</sup> /mm <sup>3</sup> | 6,14         | 6,05         | 6,22         | 6,66           | 6,37           | 5,96           |
| Platelet                                  | PLAT         | 10 <sup>3</sup> /mm <sup>3</sup> | 373          | 285          | 428          | 587            | 583            | 378            |
| Medium corpuscular volume                 | MCV          | fL                               | 67           | 72           | 66           | 67             | 68             | 65             |
| Mean corpuscular hemoglobin               | MCH          | pg                               | 19,2         | 20,0         | 18,6         | 18,9           | 19,6           | 18,5           |
| Mean corpuscular hemoglobin concentration | MCHC         | g/dL                             | 28,5         | 27,9         | 28,4         | 28,1           | 29,0           | 27,7           |

CLUSTAL O(1.2.4) multiple sequence alignment

**A)**

```

CD40L_MOUSE      KVEEEVNLHEDFVFIKKLRCKNKGEGSLSLNCEEMRRQFEDLVKDITLNKEE-KKENSF
CD40L_Swine      KIEDERNLHEDFVFIKTIQRCKQGEGLSLLNCEEIRSQFEDLVKGIMQSKVKKKEKSF
CD40L_HUMAN      KIEDERNLHEDFVFMKTIQRCNTGERSLSLLNCEEIKSQFEGFVKDIMLNKEETKKENSF
CD40L_MACFA      KIEDERNLHEDFVFMKTIQRCNTGEKSLSLNCEEIKSQFEGFVKDIMLNKEEKKKENSF
                  *:.*: * *:.*: * *:.*: * *:.*: * *:.*: * *:.*: * *:.*:
                  *:.*: * *:.*: * *:.*: * *:.*: * *:.*: * *:.*:

CD40L_MOUSE      EMQRGDEDPQIAAHVVSEANSNAASVLQWAKKGYTMSNLVMLENGKQLTVKREGLYYV
CD40L_Swine      EMHKGDDQDPQIAAHVISEASSKTASVLQWAPKGYTTLSTNLVTLNQRQLAVKRQGIYYI
CD40L_HUMAN      EMQKGDQNPQIAAHVISEASSKTTSVLQWAEKGYTMSNNLVTLNQRQLTVKRQGLYYI
CD40L_MACFA      EMQKGDQNPQIAAHVISEASSKTTSVLQWAEKGYTMSNNLVTLNQRQLTVKRQGLYYI
                  **:.*: * *:.*: * *:.*: * *:.*: * *:.*: * *:.*: * *:.*:

CD40L_MOUSE      YTQVTFCSNREPSSQRPFIIVGLWLKPSGSGSERILLKAANTHSSSQLCEQQSVHLGGVFEL
CD40L_Swine      YAQVTFCSNRDAAGQAPFIASLCLRSPSGSERILLRAANTHSSSKPCGQQSIHLGGVFEL
CD40L_HUMAN      YAQVTFCSNREASSQAPFIASLCLKSPGRFERILLRAANTHSSAKPCGQQSIHLGGVFEL
CD40L_MACFA      YAQVTFCSNREASSQAPFIASLCLKSPGRFERILLRAANTHSSAKPCGQQSIHLGGVFEL
                  *:.*: * *:.*: * *:.*: * *:.*: * *:.*: * *:.*: * *:.*:

CD40L_MOUSE      QAGASVFNVTASQVIHRVGFSSFGLLKL      209
CD40L_Swine      QPGASVFNVTDPQVSHGTGFTSFGLLKL      210
CD40L_HUMAN      QPGASVFNVTDPQVSHGTGFTSFGLLKL      210
CD40L_MACFA      QPGASVFNVTDPQVSHGTGFTSFGLLKL      210
                  * *:.*: * *:.*: * *:.*:

```

**B)**  
Percent Identity Matrix - created by Clustal 2.1

|                |        |        |        |        |
|----------------|--------|--------|--------|--------|
| 1: CD40L_MOUSE | 100.00 | 72.73  | 74.64  | 74.64  |
| 2: CD40L_Swine | 72.73  | 100.00 | 85.71  | 86.19  |
| 3: CD40L_HUMAN | 74.64  | 85.71  | 100.00 | 99.05  |
| 4: CD40L_MACFA | 74.64  | 86.19  | 99.05  | 100.00 |

**Supplementary Figure S2.** Multiple sequence alignment of extracellular domain of CD154 from different species. A) Clustal Omega 2.1 (<https://www.ebi.ac.uk/Tools/msa/clustalo/>) was used to align the protein sequences of mouse, swine, macaque fascicularis and human extracellular domain of CD154. B) Percent identity matrix of the aligned sequences created by Clustal Omega 2.1. (\*) Positions with a single, fully conserved residue. (:) Positions with conservation between amino acid groups of similar properties. (.) Positions with conservation between amino acid groups of weakly similar properties.



### **Declaración de consentimiento informado**

Yo, (Nombre y apellidos)

---

He recibido información acerca de la enfermedad conocida como Covid 19 y algunas investigaciones que se están realizando para encontrar vacunas efectivas contra la enfermedad.

He hablado con:

.....

(Nombre del médico-investigador)

Accedo a que las muestras de sangre obtenidas puedan ser utilizadas para análisis relacionados con la enfermedad o vacunas en estudio.

Manifiesto mi conformidad y doy mi consentimiento para el acceso y utilización de mis datos.

Para constancia de lo expuesto anteriormente firmo este documento, en Ciudad de la Habana, el día \_\_\_\_\_ del 2021.

---

Firma del voluntario

---

Firma del Investigador principal
